# Supplementary material for: FGF21 is required for protein restriction to extend lifespan and improve metabolic health in male mice
Source: PubMed Central journal article supplement (PMC8991228; doi:10.1038/s41467-022-29499-8), 2022-04-07
Supplement: 41467_2022_29499_MOESM2_ESM.pdf [file 41467_2022_29499_MOESM2_ESM.pdf]

## Reporting Summary

Nature Portfolio wishes to improve the reproducibility of the work that we publish. This form provides structure for consistency and transparency in reporting. For further information on Nature Portfolio policies, see our [Editorial Policies](#) and the [Editorial Policy Checklist](#).

### Statistics

For all statistical analyses, confirm that the following items are present in the figure legend, table legend, main text, or Methods section.

n/a Confirmed

- The exact sample size ( $n$ ) for each experimental group/condition, given as a discrete number and unit of measurement
- A statement on whether measurements were taken from distinct samples or whether the same sample was measured repeatedly
- The statistical test(s) used AND whether they are one- or two-sided  
*Only common tests should be described solely by name; describe more complex techniques in the Methods section.*
- A description of all covariates tested
- A description of any assumptions or corrections, such as tests of normality and adjustment for multiple comparisons
- A full description of the statistical parameters including central tendency (e.g. means) or other basic estimates (e.g. regression coefficient) AND variation (e.g. standard deviation) or associated estimates of uncertainty (e.g. confidence intervals)
- For null hypothesis testing, the test statistic (e.g.  $F$ ,  $t$ ,  $r$ ) with confidence intervals, effect sizes, degrees of freedom and  $P$  value noted  
*Give  $P$  values as exact values whenever suitable.*
- For Bayesian analysis, information on the choice of priors and Markov chain Monte Carlo settings
- For hierarchical and complex designs, identification of the appropriate level for tests and full reporting of outcomes
- Estimates of effect sizes (e.g. Cohen's  $d$ , Pearson's  $r$ ), indicating how they were calculated

*Our web collection on [statistics for biologists](#) contains articles on many of the points above.*

### Software and code

Policy information about [availability of computer code](#)

Data collection

Data analysis

For manuscripts utilizing custom algorithms or software that are central to the research but not yet described in published literature, software must be made available to editors and reviewers. We strongly encourage code deposition in a community repository (e.g. GitHub). See the Nature Portfolio [guidelines for submitting code & software](#) for further information.

### Data

Policy information about [availability of data](#)

All manuscripts must include a [data availability statement](#). This statement should provide the following information, where applicable:

- Accession codes, unique identifiers, or web links for publicly available datasets
- A description of any restrictions on data availability
- For clinical datasets or third party data, please ensure that the statement adheres to our [policy](#)

### Field-specific reporting

## Life sciences study design

All studies must disclose on these points even when the disclosure is negative.

|                 |                                                                                                                                                                                                                                                                                                                                                                                                                                                     |
|-----------------|-----------------------------------------------------------------------------------------------------------------------------------------------------------------------------------------------------------------------------------------------------------------------------------------------------------------------------------------------------------------------------------------------------------------------------------------------------|
| Sample size     | Sample sizes were generated based on power calculations as well as prior experience with aging and metabolic studies                                                                                                                                                                                                                                                                                                                                |
| Data exclusions | No data was excluded from the analysis                                                                                                                                                                                                                                                                                                                                                                                                              |
| Replication     | The nature of lifespan or aging studies makes replication of the in vivo work impractical, with the lifespan study requiring over 3 years and the metabolic study 2 years to complete the animal component. For various endpoints, we have attempted to replicate key findings by measuring multiple genes or endpoints within a specific biological niche, for instance lipid metabolism or thermogenesis, to provide some measure of replication. |
| Randomization   | All animal were randomized to their respective treatment groups.                                                                                                                                                                                                                                                                                                                                                                                    |
| Blinding        | Blinding was not possible during in vivo data collection, as diet composition was apparent within the cage and mouse genotype is required on the cage card. Individuals conducting subsequent tissue and molecular biology analysis (RNA extraction, qPCR, etc) were blinded to groups, as they only were aware of individual animal IDs.                                                                                                           |

## Reporting for specific materials, systems and methods

We require information from authors about some types of materials, experimental systems and methods used in many studies. Here, indicate whether each material, system or method listed is relevant to your study. If you are not sure if a list item applies to your research, read the appropriate section before selecting a response.

### Materials & experimental systems

| n/a                                 | Included in the study                                           |
|-------------------------------------|-----------------------------------------------------------------|
| <input type="checkbox"/>            | <input checked="" type="checkbox"/> Antibodies                  |
| <input checked="" type="checkbox"/> | <input type="checkbox"/> Eukaryotic cell lines                  |
| <input checked="" type="checkbox"/> | <input type="checkbox"/> Palaeontology and archaeology          |
| <input type="checkbox"/>            | <input checked="" type="checkbox"/> Animals and other organisms |
| <input checked="" type="checkbox"/> | <input type="checkbox"/> Human research participants            |
| <input checked="" type="checkbox"/> | <input type="checkbox"/> Clinical data                          |
| <input checked="" type="checkbox"/> | <input type="checkbox"/> Dual use research of concern           |

### Methods

| n/a                                 | Included in the study                           |
|-------------------------------------|-------------------------------------------------|
| <input checked="" type="checkbox"/> | <input type="checkbox"/> ChIP-seq               |
| <input checked="" type="checkbox"/> | <input type="checkbox"/> Flow cytometry         |
| <input checked="" type="checkbox"/> | <input type="checkbox"/> MRI-based neuroimaging |

## Antibodies

|                 |                                                                                                                                                                                                                                                                                               |
|-----------------|-----------------------------------------------------------------------------------------------------------------------------------------------------------------------------------------------------------------------------------------------------------------------------------------------|
| Antibodies used | Guinea pig anti-insulin (1:800, #18-0067, Invitrogen, Grand Island, NY) with secondary detection performed using HRP-conjugated rabbit anti-guinea pig (1:800, A5545, Sigma, Saint Louis, MO) was used to label pancreatic islets                                                             |
| Validation      | The Invitrogen guinea pig anti-insulin antibody is well established to bind insulin. It has been used in multiple studies to bind insulin and colocalize with the pancreatic beta-cells, and has been confirmed via genetic knockout/downregulation experiments. PMIDs: 23217255 and 29914854 |

## Animals and other organisms

Policy information about [studies involving animals](#); [ARRIVE guidelines](#) recommended for reporting animal research

|                         |                                                                                                                                                                                                                                                                                                        |
|-------------------------|--------------------------------------------------------------------------------------------------------------------------------------------------------------------------------------------------------------------------------------------------------------------------------------------------------|
| Laboratory animals      | Male mice on the C57BL6 background were used in this study. Mice were started on diets at 3 months of age until natural death, or at 12 months of age until 16 months. Animals were used in 12:12 light/dark room in standard shoebox cages with standard room-level temperature and humidity controls |
| Wild animals            | No wild animals were used                                                                                                                                                                                                                                                                              |
| Field-collected samples | No field collected samples                                                                                                                                                                                                                                                                             |
| Ethics oversight        | All work was approved by the Pennington Biomedical Research Center Institutional Animal Care and Use Committee                                                                                                                                                                                         |

Note that full information on the approval of the study protocol must also be provided in the manuscript.
